# Supplementary material for: A dynamic time order network for time-series gene expression data analysis
Source: PubMed Central journal article supplement (PMC3524318; doi:10.1186/1752-0509-6-s3-s9), 2012-12-17
Supplement: 1752-0509-6-S3-S9-S2.pdf [file 1752-0509-6-S3-S9-S2.pdf]

## Solving of parameters $\beta_{i1}$ and $\beta_{i3}$ .

For parameters  $\beta_{i1}$ , constrains in Additional file 1 can be written as:

$$\beta_{i10} + \beta_{i11}K_1 + \beta_{i12}K_1^2 + \beta_{i13}K_1^3 = \beta_{i20} + \beta_{i21}K_1 + \beta_{i22}K_1^2 + \beta_{i23}K_1^3$$

$$\beta_{i11} + 2\beta_{i12}K_1 + 3\beta_{i13}K_1^2 = \beta_{i21} + 2\beta_{i22}K_1 + 3\beta_{i23}K_1^2$$

$$2\beta_{i12} + 6\beta_{i13}K_1 = 2\beta_{i22} + 6\beta_{i23}K_1$$

$$\beta_{i12} = 0$$

Solving these equations simultaneously leads to:

$$\beta_{i10} = \beta_{i20} - \frac{K_1^2}{3}\beta_{i22}$$

$$\beta_{i11} = \beta_{i21} + K_1\beta_{i22}$$

$$\beta_{i12} = 0$$

$$\beta_{i13} = \frac{\beta_{i22} + 3K_1\beta_{i23}}{3K_1}.$$

For parameters  $\beta_{i3}$ , constrains in Additional file 1 can be written as:

$$\beta_{i20} + \beta_{i21}K_2 + \beta_{i22}K_2^2 + \beta_{i23}K_2^3 = \beta_{i30} + \beta_{i31}K_2 + \beta_{i32}K_2^2 + \beta_{i33}K_2^3$$

$$\beta_{i21} + 2\beta_{i22}K_2 + 3\beta_{i23}K_2^2 = \beta_{i31} + 2\beta_{i32}K_2 + 3\beta_{i33}K_2^2$$

$$2\beta_{i22} + 6\beta_{i23}K_2 = 2\beta_{i32} + 6\beta_{i33}K_2$$

$$2\beta_{i32} + 6\beta_{i33}K_2 = 0$$

Solving these equations simultaneously leads to:

$$\beta_{i30} = \beta_{i20} + K_2^3\beta_{i23} - K_2^3\frac{\beta_{i22} + 3K_2^2\beta_{i23}}{3K_2 - 96}$$

$$\beta_{i31} = \beta_{i21} - 3K_2^2\beta_{i23} + 3K_2^2\frac{\beta_{i22} + 3K_2^2\beta_{i23}}{3K_2 - 96}$$

$$\beta_{i32} = -96 \times \frac{\beta_{i22} + 3K_2^2\beta_{i23}}{3K_2 - 96}$$

$$\beta_{i33} = \frac{\beta_{i22} + 3K_2^2\beta_{i23}}{3K_2 - 96}.$$
