# Supplementary material for: A dynamic time order network for time-series gene expression data analysis
Source: PubMed Central journal article supplement (PMC3524318; doi:10.1186/1752-0509-6-s3-s9), 2012-12-17
Supplement: 1752-0509-6-S3-S9-S4.pdf [file 1752-0509-6-S3-S9-S4.pdf]

## Likelihood computation of regression for the time order determination

Based on the normality assumption, we have  $\mathbf{y}_{it} \sim \mathcal{N}(\mathbf{X}_t \mathbf{b}_i, \sigma_{MRi}^2)$ ,  $\mathbf{X}_t$  is the row of  $\mathbf{X}$  at time  $t$ . Therefore the likelihood of the models in Equations 12 and 13 for the set of 12 i.i.d. samples  $\mathcal{D}$  is:

$$\mathcal{L}(\mathbf{b}_i, \sigma_{MRi}^2 | \mathcal{D}) = (2\pi\sigma_{MRi}^2)^{-\frac{12}{2}} \prod_{0 \leq t \leq 32} \exp\left(-\frac{(\mathbf{y}_{it} - \mathbf{X}_t \mathbf{b}_i)^2}{2\sigma_{MRi}^2}\right).$$

The corresponding log-likelihood is:

$$\log \mathcal{L}(\mathbf{b}_i, \sigma_{MRi}^2 | \mathcal{D}) = - \sum_{0 \leq t \leq 32} \left( \frac{(\mathbf{y}_{it} - \mathbf{X}_t \mathbf{b}_i)^2}{2\sigma_{MRi}^2} \right) - \frac{12}{2} \log(\sigma_{MRi}^2) - \frac{12}{2} \log(2\pi).$$

Parameters  $\mathbf{b}_i$  and  $\sigma_{MRi}^2$  are estimated by ordinary least squares:

$$\begin{aligned} \hat{\mathbf{b}}_i &= (\mathbf{X}^T \mathbf{X})^{-1} \mathbf{X}^T \mathbf{y}_i \\ \hat{\sigma}_{MRi}^2 &= \frac{(\mathbf{y}_i - \mathbf{X} \hat{\mathbf{b}}_i)^T (\mathbf{y}_i - \mathbf{X} \hat{\mathbf{b}}_i)}{12}. \end{aligned}$$

Using the estimated parameters  $\hat{\mathbf{b}}_i$  and  $\hat{\sigma}_{MRi}^2$ , we can formulate the log-likelihood such as:

$$\log \mathcal{L}(\mathbf{b}_i, \sigma_{MRi}^2 | \mathcal{D}) = -\frac{12}{2} \log\left(\frac{(\mathbf{y}_i - \mathbf{X} \hat{\mathbf{b}}_i)^T (\mathbf{y}_i - \mathbf{X} \hat{\mathbf{b}}_i)}{12}\right) + C,$$

where  $C$  is a constant term and is the same for every gene.
