# Supplementary material for: A dynamic time order network for time-series gene expression data analysis
Source: Springer Nature journal article supplement (doi:10.1186/1752-0509-6-s3-s9), 2012-12-01
Supplement: 12918_2012_1053_MOESM3_ESM.pdf [file 12918_2012_1053_MOESM3_ESM.pdf]

**Matrix T\*.**

$$\begin{pmatrix} 1 & 0 & 0 & 0 \\ 1 & 1 & 1 & 1 \\ 1 & 2 & 4 & 8 \\ 1 & 4 & 16 & 64 \\ 1 & 6 & 36 & 216 \\ 1 & 8 & 64 & 512 \\ 1 & 12 & 144 & 1728 \\ 1 & 16 & 256 & 4096 \\ 1 & 20 & 400 & 8000 \\ 1 & 24 & 576 & 13824 \\ 1 & 28 & 784 & 21952 \\ 1 & 32 & 1024 & 32768 \end{pmatrix}$$
